# Supplementary material for: A high water-content and high elastic dual-responsive polyurethane hydrogel for drug delivery
Source: Royal Society of Chemistry journal article supplement (doi:10.1039/c5tb01702e), 2015-01-01
Supplement: c5tb01702e1.pdf [file c5tb01702e1.pdf]

## High water-content and high elastic dual-responsive polyurethane hydrogel for drug delivery

Jinze Li,<sup>†,§</sup> Li Ma,<sup>†,§</sup> Guangxin Chen,<sup>†,‡</sup> Zheng Zhou\*,<sup>†</sup> and Qifang Li\*,<sup>†,‡,§</sup>

<sup>†</sup>State Key Laboratory of Chemical Resource Engineering, Beijing University of Chemical Technology, Beijing 100029, China

<sup>‡</sup>Key Laboratory of Carbon Fiber and Functional Polymers, Ministry of Education, Beijing University of Chemical Technology, Beijing 100029, China

<sup>§</sup> College of Materials Science and Engineering, Beijing University of Chemical Technology, Beijing 100029, China

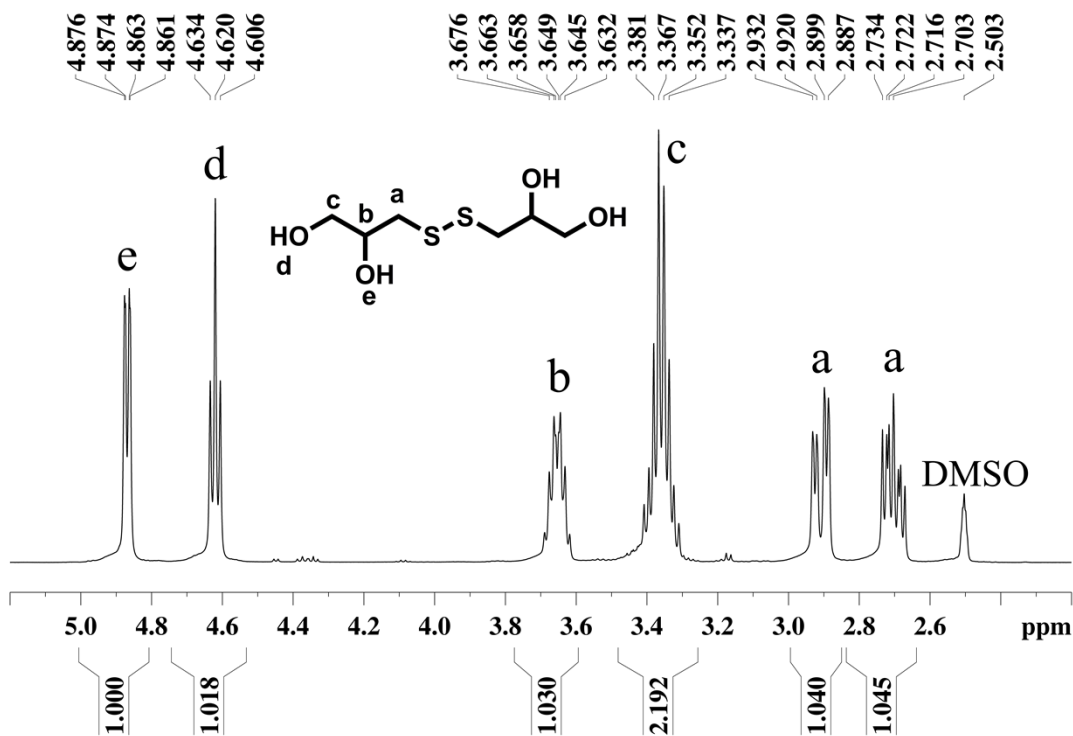

Figure S1. <sup>1</sup>H NMR spectrum of DSO in DMSO.

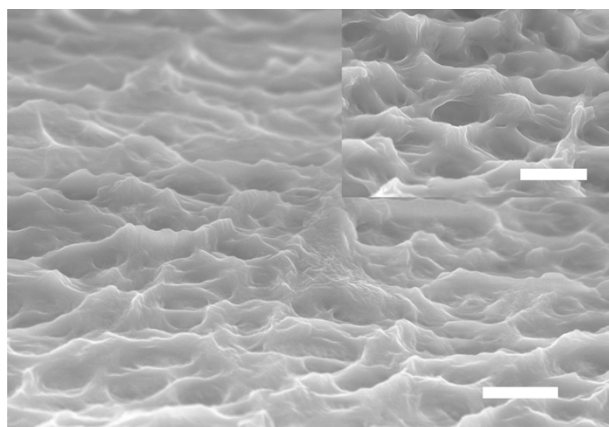

**Figure S2.** SEM images of the hydrogel after lyophilization. The scale is 1  $\mu\text{m}$
